# Supplementary material
Source: publisher figshare collection journal article supplement (https://gsapubs.figshare.com/articles/dataset/_/12540278)

## Supplementary data for

## Oceanic Origins of Continental Mantle Lithosphere

**Andrea Servali<sup>1</sup> and Jun Korenaga<sup>1</sup>**

<sup>1</sup>Department of Geology and Geophysics, Yale University, PO Box 208109, New Haven, CT 06520-8109

\*Corresponding author: Andrea Servali (email: [andrea.servali@yale.edu](mailto:andrea.servali@yale.edu))

### **Surface geology of cratons:**

The data set includes samples from Churchill Province, Kaapvaal, Tanzania, Northern and Southern China, North Atlantic, Slave, Siberian, Karelian, and Wyoming cratons. In what follows, we summarize notable geological and geochemical characteristics for each of these cratons.

The Kaapvaal Craton comprises of several Archean terranes stabilized and amalgamated mostly by the early Proterozoic (de Wit et al., 1992). The Eastern Terrane is dominated by Paleoarchean tonalite-trondhjemite-granodiorite (TTG) gneisses and greenstone belts, whereas the Western Terrane is composed of Mesoarchean granitic gneisses and unfoliated granitoids and greenstone belts (e.g., Griffin et al., 2004). The welding of the Eastern and Western terranes took place during the Mesoarchean (e.g., Carlson and Moore, 2004). Two additional major modifications occurred to the Kaapvaal continental lithosphere, one in the Paleoproterozoic coincident to the Bushveld layered intrusion, the other in the Neoproterozoic with the accretion of the Namaqua-Natal orogenic belt (Carlson and Moore, 2004). The Kaapvaal Craton is surrounded by the Namaqua-Natal Province and the Rehoboth Province, both of which accreted

22 during the Paleoproterozoic (Janney et al, 2010).

23 Mantle xenoliths from the Tanzania region sample mantle beneath two distinct regions:  
24 the highly metamorphosed Dodoman belt (Manya et al, 2006) located within the Tanzania  
25 Craton, which is composed of early to mid-Archean terranes (Chesley et al., 1999), and the  
26 currently rifting Proterozoic Usagaran belt located east of the craton.

27 Eastern China is characterized by a complex terrane assemblage subdivided into North  
28 and South China Blocks, connected by the Qinling-Dabie-Sulu orogenic belt formed during their  
29 collision in the Mesozoic (Menzies et al., 2007). The South China Block encompasses the  
30 Archean to Paleoproterozoic Yangtze and the Paleoproterozoic to Mesoproterozoic Cathaysia  
31 blocks that amalgamated in the Neoproterozoic. The South China Block experienced extensive  
32 magmatism between Paleozoic and Cenozoic that resulted into major granitic and basaltic  
33 intrusions in the crystalline basement (Liu et al., 2012). The Northern China Block includes three  
34 regions: Western and Eastern Blocks and the Trans-North China Orogen. The Western Block has  
35 been tectonically stable and its crust is characterized by Archean metasedimentary belts. Instead,  
36 the East Block consists of re-activated Archean continental lithosphere that contains two distinct  
37 mantle xenoliths age groups spanning Phanerozoic and Archean; their age gap occurred in a  
38 rapid transition between the Paleozoic and Mesozoic, but relevant tectonics is still debated (e.g.  
39 Menzies et al., 2007).

40 The bulk of the Archean North Atlantic Craton is located in southern Greenland, which is  
41 covered by mostly perennial glaciers. The western part of the craton mainly consists of Neo- to  
42 Mesoarchean TTG and granitoids intermixed by Eoarchean terranes (Witting et al., 2010). The  
43 Paleoproterozoic Nagssuqotidian Orogen bounds to the north the North Atlantic Craton and it  
44 consists of reworked Archean terrains (Bizzarro et al., 2003; Witting et al., 2008). The North

Atlantic Craton retains highly refractory and pristine Archean mantle xenoliths and close age correspondence between crust and mantle (Hanghøj et al., 2001; Pearson et al., 2014).

Similar to the Kaapvaal Craton, the Siberian Craton is underlain by a lithospheric mantle characterized by silica enrichment. The Siberian Craton is mostly covered by Paleozoic sediments, but exposed parts of Anabar and Aldan shields show Paleoproterozoic gneisses and granulites basement (Ionov et al., 2010). The majority of mantle xenoliths here presented were collected from the Udachnaya and Obnazhennaya kimberlite fields (Ionov et al., 2015).

The Karelian Craton is predominantly composed of greenstone belts and TTG gneisses dating around the Neoarchean with some interbedded Mesoproterozoic terranes. All mantle xenoliths were recovered from the Kaavi-Kuopio kimberlite group in proximity to the southwestern border of the Karelian craton. During the Paleoproterozoic the border of the craton experienced a rifting event that was eventually followed by accretionary tectonics. These tectonic processes are responsible for mantle metasomatism and overprinting of the shallow Archean continental mantle (Peltonen et al, 2006).

The Laurentian shield consists of an assemblage of numerous Archean and Proterozoic terranes that are surrounded by Phanerozoic margins. Our compilation focuses on data collected from the Churchill Province, the Slave Craton and the Wyoming Craton. The Churchill Province experienced extensive Paleoproterozoic reactivation and contains two regions of geologically distinct age groups, one characterized by Archean gneisses, greenstone belts and granitoids, the other by Proterozoic magmatic and metamorphic rocks, associated to large igneous provinces and to the Taltson-Thelon orogeny, respectively (Irvine et al, 2003). The Slave Craton displays a distinct transition in age from east to west; the eastern basement is dominated by Neoarchean greenstone belts and plutonic suites, and the western basement contains Mesoproterozoic rocks

including outliers as old as the Eoarchean Acasta gneiss (Heaman and Pearson, 2010). Lastly, kimberlites from the Wyoming province sample three distinct tectonic areas, the Archean Wyoming Craton, the Paleoproterozoic Great Fall tectonic suture zone, and the closely dated Central Plains orogen.

### **Figure Captions:**

**Supplementary Figure DR1:** Covariation of whole-rock Fo contents and model ages for mantle xenoliths from (a) Kaapvaal and Tanzania cratons, (b) China cratons, (c) North Atlantic craton, and (d) other major cratons. For the majority of data, both  $T_{RD}$  and  $T_{MA}$  ages are shown (with  $T_{MA}$  being older). Solid symbols denote  $T_{RD}$  model ages corrected for eruption contamination, whereas open symbols denote those uncorrected. Dark blue symbols connected with line denote data with  $T_{MA}-T_{RD} < 0.2$  Gy. Light blue symbols are used for data with  $T_{MA}-T_{RD} < 1$  Gy. Symbols connected by dashed line are used for data uncorrected for eruption contamination. Gray symbols represent  $T_{RD}$  ages, for data with  $T_{MA}$  more than 1 Gy apart from  $T_{RD}$ , or with only  $T_{RD}$  ages reported. Our coding of symbols is to place greater emphasis on more reliable data. Shown in pink shading is the range of Mg# corresponding to the thermal evolution model of Korenaga (2017) for three different values of Urey ratio. The parameterization of Herzberg and Rudnick (2012) is used to convert mantle potential temperature to the Mg# of mantle residue.

**Supplementary Figure DR2:** (a) Covariation of whole-rock Mg# and model ages for the global compilation of mantle xenoliths data. (b) Covariation of Fo contents and model ages for the global compilation of mantle xenoliths data. For the majority of data, both  $T_{RD}$  and  $T_{MA}$  ages are shown (with  $T_{MA}$  being older). Solid symbols denote  $T_{RD}$  model ages corrected for eruption

contamination, whereas open symbols denote those uncorrected. Here the color coding of the symbols represents the rock types of mantle xenoliths (green: dunite, red: lherzolite, blue: harzburgite, brown: wehrlite, yellow: pyroxenite, gray: peridotites (unclassified)). As in Fig. DR1, predictions based on the thermal evolution model of Korenaga (2017) are also shown in both panels.

**Supplementary Figure DR3:** Comparison of  $T_{RD}$  ages computed with the estimates of primordial  $^{187}\text{Re}/^{188}\text{Os}$  and  $^{187}\text{Os}/^{188}\text{Os}$  according to Shirley and Walker (1998), Miesel et al. (2001), Brandon et al. (2001), and Walker et al. (2002). Dashed lines show differences between them; difference can be up to ~500 Myr for Phanerozoic model ages.

**Supplementary Table:** The table is organized by craton rather than by author or alphabetical order. From row 2 through 175 are for xenoliths from the Kaapvaal Craton and its surroundings, from row 176 through 194 are for the Tanzania Craton, from row 195 through 376 are for China Blocks, from row 377 through 447 are for the North Atlantic Craton and its surroundings, from row 348 through 466 are for the Karelian Craton, from row 467 through 517 are for the Siberian Craton, and from row 519 through 602 are those from the North American continent. The first five columns provide general information on sample: sample number, kimberlite in which it was collected, reference paper or papers, and the approximate location of the kimberlite. The next eleven columns contain major modal mineral composition and major oxide compositions in weight percent. Columns 17 and 18 are for equilibration temperature and pressure, respectively. Column 19 is for whole-rock Mg#. Mg# is either computed using reported FeO and Fe<sub>2</sub>O<sub>3</sub> by  $(\text{MgO} \div 40.3044) \div ((\text{MgO} \div 40.3044) + ((\text{FeO} + \text{Fe}_2\text{O}_3 \times 0.8998) \div 71.844)) \times 100$  or, when iron oxide data is not readily available, it is reported as given by original publication. Column 20

includes data for Fo contents as reported by original publications. The next five columns (21-25) and column 29 contain information on whole-rock Re-Os concentrations as well as corresponding reported model ages by the authors of original analyses. Column 21 contains  $^{187}\text{Os}/^{188}\text{Os}$  data, column 22 contains  $^{187}\text{Re}/^{188}\text{Os}$  data, and columns 23 contains  $^{187}\text{Os}/^{188}\text{Os}$  corrected for contamination during kimberlite eruption. Columns 24 and 25 list, respectively,  $T_{\text{RD}}$  and  $T_{\text{MA}}$  reported by authors, and column 29 shows the primordial  $^{187}\text{Re}/^{188}\text{Os}$  and  $^{187}\text{Os}/^{188}\text{Os}$  estimates adopted for model age calculations in columns 24 and 25. Columns 26 to 28 are for the rock types of mantle xenoliths. We report rock types either based on modal mineralogy or, when absent, according to rock type as reported by original publications. Nomenclature for rock type is as follow: G stands for garnet, S for spinel, H for harzburgite, L for lherzolite, Py for pyroxenite, P for peridotite, D for dunite, W for wehrnite. Columns 30-33 include model ages computed using  $T_{\text{RD}}$  and  $T_{\text{MA}}$  from Shirley and Walker (1998). Columns 30 and 31 are  $T_{\text{RD}}$  and  $T_{\text{MA}}$  recomputed for the values of primordial  $^{187}\text{Re}/^{188}\text{Os}$  and  $^{187}\text{Os}/^{188}\text{Os}$  estimates from original manuscript, whereas columns 32 and 33 contain recomputed primordial  $^{187}\text{Re}/^{188}\text{Os}$  and  $^{187}\text{Os}/^{188}\text{Os}$  estimates for primordial  $^{187}\text{Re}/^{188}\text{Os}$  and  $^{187}\text{Os}/^{188}\text{Os}$  values from Walker et al. (2002).

## REFERENCES CITED

Becker, H., Horan, M.F., Walker, R.J., Gao, S., Lorand, J.P., Rudnick, R.L., 2006. Highly siderophile element composition of the Earth's primitive upper mantle: constraints from new data on peridotite massifs and xenoliths. *Geochimica et Cosmochimica Acta*, v. 70, p. 4528-4550.

136 Bizzarro, M. and Stevenson, R.K., 2003. Major element composition of the lithospheric mantle  
137 under the North Atlantic craton: evidence from peridotite xenoliths of the Sarfartoq area,  
138 southwestern Greenland. *Contributions to Mineralogy and Petrology*, v. 146, p. 223-240.

139 Brandon, A.D., Snow, J.E., Walker, R.J., Morgan, J.W., Mock, T.D., 2001.  $^{190}\text{Pt}$ - $^{186}\text{Os}$  and  $^{187}\text{Re}$ -  
140  $^{187}\text{Os}$  systematics of abyssal peridotites. *Earth Planet Sci Lett*, v. 177, p. 319-335.

141 Canil, D. and O'Neill, H.S.C., 1996. Distribution of ferric iron in some upper mantle  
142 assemblages. *Journal of Petrology*, v. 37, p. 609-635.

143 Carlson, R.W. and Moore, R.O., 2004. Age of the Eastern Kaapvaal mantle: Re-Os isotope data  
144 for peridotite xenoliths from the Monastery kimberlite. *South African Journal of Geology*, v.  
145 107, p. 81-90.

146 Carlson, R.W., Irving, A.J., Schulze, D.J. and Hearn, B.C., 2004. Timing of Precambrian melt  
147 depletion and Phanerozoic refertilization events in the lithospheric mantle of the Wyoming  
148 Craton and adjacent Central Plains Orogen. *Lithos*, v. 77, p. 453-472.

149 Chesley, J.T., Rudnick, R.L. and Lee, C.T., 1999. Re-Os systematics of mantle xenoliths from  
150 the East African Rift: Age, structure, and history of the Tanzanian craton. *Geochimica et*  
151 *Cosmochimica Acta*, v. 63, p. 1203-1217.

152 Chu, Zhu-Yin., Wu, Fu-Yuan., Walker, R.J., Rudnick, R.L., Pitcher, L., Puchtel, I.S., Yang,  
153 Yue-Heng. and Wilde, S.A., 2009. Temporal evolution of the lithospheric mantle beneath  
154 the eastern North China Craton. *Journal of Petrology*, v. 50, p. 1857-1898.

155 de Wit, M.J., de Ronde, C.E., Tredoux, M., Roering, C., Hart, R.J., Armstrong, R.A., Green,  
156 R.W., Peberdy, E. and Hart, R.A., 1992. Formation of an Archaean continent. *Nature*,  
157 v. 357, p. 553-562.

158 Doucet, L.S., Ionov, D.A., Golovin, A.V. and Pokhilenko, N.P., 2012. Depth, degrees and  
159 tectonic settings of mantle melting during craton formation: inferences from major and trace  
160 element compositions of spinel harzburgite xenoliths from the Udachnaya kimberlite, central  
161 Siberia. *Earth and Planetary Science Letters*, v. 359, p. 206-218.

162 Doucet, L.S., Ionov, D.A. and Golovin, A.V., 2013. The origin of coarse garnet peridotites in  
163 cratonic lithosphere: new data on xenoliths from the Udachnaya kimberlite, central Siberia.  
164 *Contributions to Mineralogy and Petrology*, v. 165, p. 1225-1242.

165 Gao, Shan, Rudnick, R.L., Carlson, R.W., McDonough, W.F. and Liu, Yong-Sheng, 2002. Re–  
166 Os evidence for replacement of ancient mantle lithosphere beneath the North China craton.  
167 *Earth and Planetary Science Letters*, v. 198, p. 307-322.

168 Griffin, W.L., Graham, S., O'Reilly, S.Y. and Pearson, N.J., 2004. Lithosphere evolution beneath  
169 the Kaapvaal Craton: Re–Os systematics of sulfides in mantle-derived peridotites. *Chemical*  
170 *Geology*, v. 208, p. 89-118.

171 Hanghøj, K., P. Kelemen, S. Bernstein, J. Blusztajn, and R. Frei, 2001, Osmium isotopes in the  
172 Wiedemann Fjord mantle xenoliths: A unique record of cratonic mantle formation by  
173 melt depletion in the Archaean, *Geochem. Geophys. Geosyst.*, v. 2, 1011, doi:  
174 10.1029/2000GC000085.

175 Heaman, L.M. and Pearson, D.G., 2010. Nature and evolution of the Slave Province  
176 subcontinental lithospheric mantle. This article is one of a series of papers published in this  
177 Special Issue on the theme Lithoprobe parameters, processes, and the evolution of a  
178 continent. *Canadian Journal of Earth Sciences*, v. 47, p. 369-388.

179 Herzberg, C. and Rudnick, R., 2012. Formation of cratonic lithosphere: an integrated thermal  
180 and petrological model. *Lithos*, v. 149, p. 4-15.



181 Ionov, D.A., Carlson, R.W., Doucet, L.S., Ashchepkov I.V., 2010. Composition of the  
182 Lithospheric Mantle in the Siberian Craton: New constraints from fresh peridotites in the  
183 Udachnaya-East Kimberlite. *Journal of Petrology*, v. 51, p. 2177-2210.

184 Ionov, D.A., Carlson, R.W., Doucet, L.S., Golovin, A.V. and Oleinikov, O.B., 2015a. The age  
185 and history of the lithospheric mantle of the Siberian craton: Re–Os and PGE study of  
186 peridotite xenoliths from the Obnazhennaya kimberlite. *Earth and Planetary Science Letters*,  
187 v. 428, p. 108-119.

188 Ionov, D.A., Doucet, L.S., Carlson, R.W., Golovin, A.V. and Korsakov, A.V., 2015b. Post-  
189 Archean formation of the lithospheric mantle in the central Siberian craton: Re–Os and PGE  
190 study of peridotite xenoliths from the Udachnaya kimberlite. *Geochimica et Cosmochimica*  
191 *Acta*, v. 165, p. 466-483.

192 Irvine, G.J., 2001. The Slave Craton-peridotite xenoliths from the Jericho Kimberlite.  
193 [Ph.D.thesis]: University of Durham, p. 142-227.

194 Irvine, G.J., Pearson, D.G., Kjarsgaard, B.A., Carlson, R.W., Kopylova, M.G. and Dreibus,  
195 G., 2003. A Re–Os isotope and PGE study of kimberlite-derived peridotite xenoliths from  
196 Somerset Island and a comparison to the Slave and Kaapvaal cratons. *Lithos*, v. 71, p. 461-  
197 488.

198 Janney, P.E., Shirey, S.B., Carlson, R.W., Pearson, D.G., Bell, D.R., Le Roex, A.P., Ishikawa,  
199 A., Nixon, P.H. and Boyd, F.R., 2010. Age, composition and thermal characteristics of  
200 South African off-craton mantle lithosphere: Evidence for a multi-stage history. *Journal of*  
201 *Petrology*, v. 51, p. 1849-1890.

202 Kopylova, M.G. and Russell, J.K., 2000. Chemical stratification of cratonic lithosphere:  
 203 constraints from the Northern Slave craton, Canada. *Earth and Planetary Science Letters*, v.  
 204 181, p. 71-87.

205 Korenaga, J., 2017. Pitfalls in modeling mantle convection with internal heat production. *Journal*  
 206 *of Geophysical Research Solid Earth*, v. 122, p. 4064-4085, doi:10.1002/2016JB013850.

207 Liu, Jingao, Rudnick, R.L., Walker, R.J., Gao, Shan, Wu, Fuyuan. and Piccoli, P.M., 2010.  
 208 Processes controlling highly siderophile element fractionations in xenolithic peridotites and  
 209 their influence on Os isotopes. *Earth and Planetary Science Letters*, v. 297, p. 287-297.

210 Liu, Chuan-Zhou., Liu, Zhi-Chao., Wu, Fu-Yuan and Chu, Zhu-Yin, 2012. Mesozoic accretion  
 211 of juvenile sub-continental lithospheric mantle beneath South China and its implications:  
 212 Geochemical and Re–Os isotopic results from Ningyuan mantle xenoliths. *Chemical*  
 213 *Geology*, v. 291, p.186-198.

214 Many, S., Kobayashi, K., Maboko, M.A. and Nakamura, E., 2006. Ion microprobe zircon U–Pb  
 215 dating of the late Archaean metavolcanics and associated granites of the Musoma-Mara  
 216 Greenstone Belt, Northeast Tanzania: Implications for the geological evolution of the  
 217 Tanzania Craton. *Journal of African Earth Sciences*, v. 45, p. 355-366.

218 Meisel, T., Walker, R.J., Irving, A.J. and Lorand, J.P., 2001. Osmium isotopic compositions of  
 219 mantle xenoliths: a global perspective. *Geochimica et Cosmochimica Acta*, v. 65, p.1311-  
 220 1323.

221 Menzies, M., Xu, Y., Zhang, H. and Fan, W., 2007. Integration of geology, geophysics and  
 222 geochemistry: a key to understanding the North China Craton. *Lithos*, v. 96, p. 1-21.

223 Pearson, D.G., Carlson, R.W., Shirey, S.B., Boyd, F.R. and Nixon, P.H., 1995. The Stabilisation  
 224 of Archaean lithospheric mantle: A Re Os isotope study of peridotite xenoliths from the  
 225 Kaapvaal craton. *Earth and Planetary Science Letters*, v. 134, p. 341-357.

226 Pearson, D.G., Wittig, N., 2014. The Formation and Evolution of Cratonic Mantle  
 227 Lithosphere – Evidence from Mantle Xenoliths. In *Treatise on Geochemistry* (Second  
 228 Edition), v. 3, p. 255-292.

229 Peltonen, P. and Brügmann, G., 2006. Origin of layered continental mantle (Karelian craton,  
 230 Finland): geochemical and Re–Os isotope constraints. *Lithos*, v. 89, p. 405-423.

231 Rudnick, R.L., Gao, Shan, Ling, Wen-li, Liu, Yong-shen and McDonough, W.F., 2004.  
 232 Petrology and geochemistry of spinel peridotite xenoliths from Hannuoba and Qixia, North  
 233 China craton. *Lithos*, v. 77, p. 609-637.

234 Sand, K.K., Waight, T.E., Pearson, D.G., Nielsen, T.F., Makovicky, E. and Hutchison, M.T.,  
 235 2009. The lithospheric mantle below southern West Greenland: A geothermobarometric  
 236 approach to diamond potential and mantle stratigraphy. *Lithos*, v. 112, p. 1155-1166.

237 Shirey, S.B. and Walker, R.J., 1998. The Re-Os isotope system in cosmochemistry and high  
 238 temperature geochemistry. *Annual Review of Earth and Planetary Sciences*, v. 26, p 423-  
 239 500.

240 Simon, N.S., Carlson, R.W., Pearson, D.G. and Davies, G.R., 2007. The origin and evolution of  
 241 the Kaapvaal cratonic lithospheric mantle. *Journal of Petrology*, v. 48, p. 589-625.

242 Walker, R.J., Carlson, R.W., Shirey, S.B. and Boyd, F.R., 1989. Os, Sr, Nd, and Pb isotope  
 243 systematics of southern African peridotite xenoliths: implications for the chemical evolution  
 244 of subcontinental mantle. *Geochimica et Cosmochimica Acta*, v. 53, p. 1583-1595.

245

246 Walker, R.J., Horan, M.F., Morgan, J.W., Becker, H., Grossman, J.N. and Rubin, A.E., 2002.  
 247 Comparative  $^{187}\text{Re}$ - $^{187}\text{Os}$  systematics of chondrites: Implications regarding early solar  
 248 system processes. *Geochimica et Cosmochimica Acta*, v. 66, p. 4187-4201.  
 249 Wittig, N., Pearson, D.G., Webb, M., Ottley, C.J., Irvine, G.J., Kopylova, M., Jensen, S.M. and  
 250 Nowell, G.M., 2008. Origin of cratonic lithospheric mantle roots: A geochemical study of  
 251 peridotites from the North Atlantic Craton, West Greenland. *Earth and Planetary Science*  
 252 *Letters*, v. 274, p. 24-33.  
 253 Wittig, N., Webb, M., Pearson, D.G., Dale, C.W., Ottley, C.J., Hutchison, M., Jensen, S.M. and  
 254 Luguet, A., 2010. Formation of the North Atlantic Craton: Timing and mechanisms  
 255 constrained from Re–Os isotope and PGE data of peridotite xenoliths from SW Greenland.  
 256 *Chemical Geology*, v. 276, p. 166-187.  
 257 Xu, Yi-Gang, Blusztajn, J., Ma, Jin-Long, Suzuki, K., Liu, J.F. and Hart, S.R., 2008. Late  
 258 Archean to Early Proterozoic lithospheric mantle beneath the western North China craton:  
 259 Sr–Nd–Os isotopes of peridotite xenoliths from Yangyuan and Fansi. *Lithos*, v. 102, p.25-  
 260 42.  
 261 Zhang, Hong-Fu, Goldstein, S.L., Zhou, Xin-Hua, Sun, Min, Zheng, Jian-Ping and Cai,  
 262 Yue, 2008. Evolution of subcontinental lithospheric mantle beneath eastern China: Re–Os  
 263 isotopic evidence from mantle xenoliths in Paleozoic kimberlites and Mesozoic basalts.  
 264 *Contributions to Mineralogy and Petrology*, v. 155, p. 271-293.

Table DR1. Data and sources for all cratons

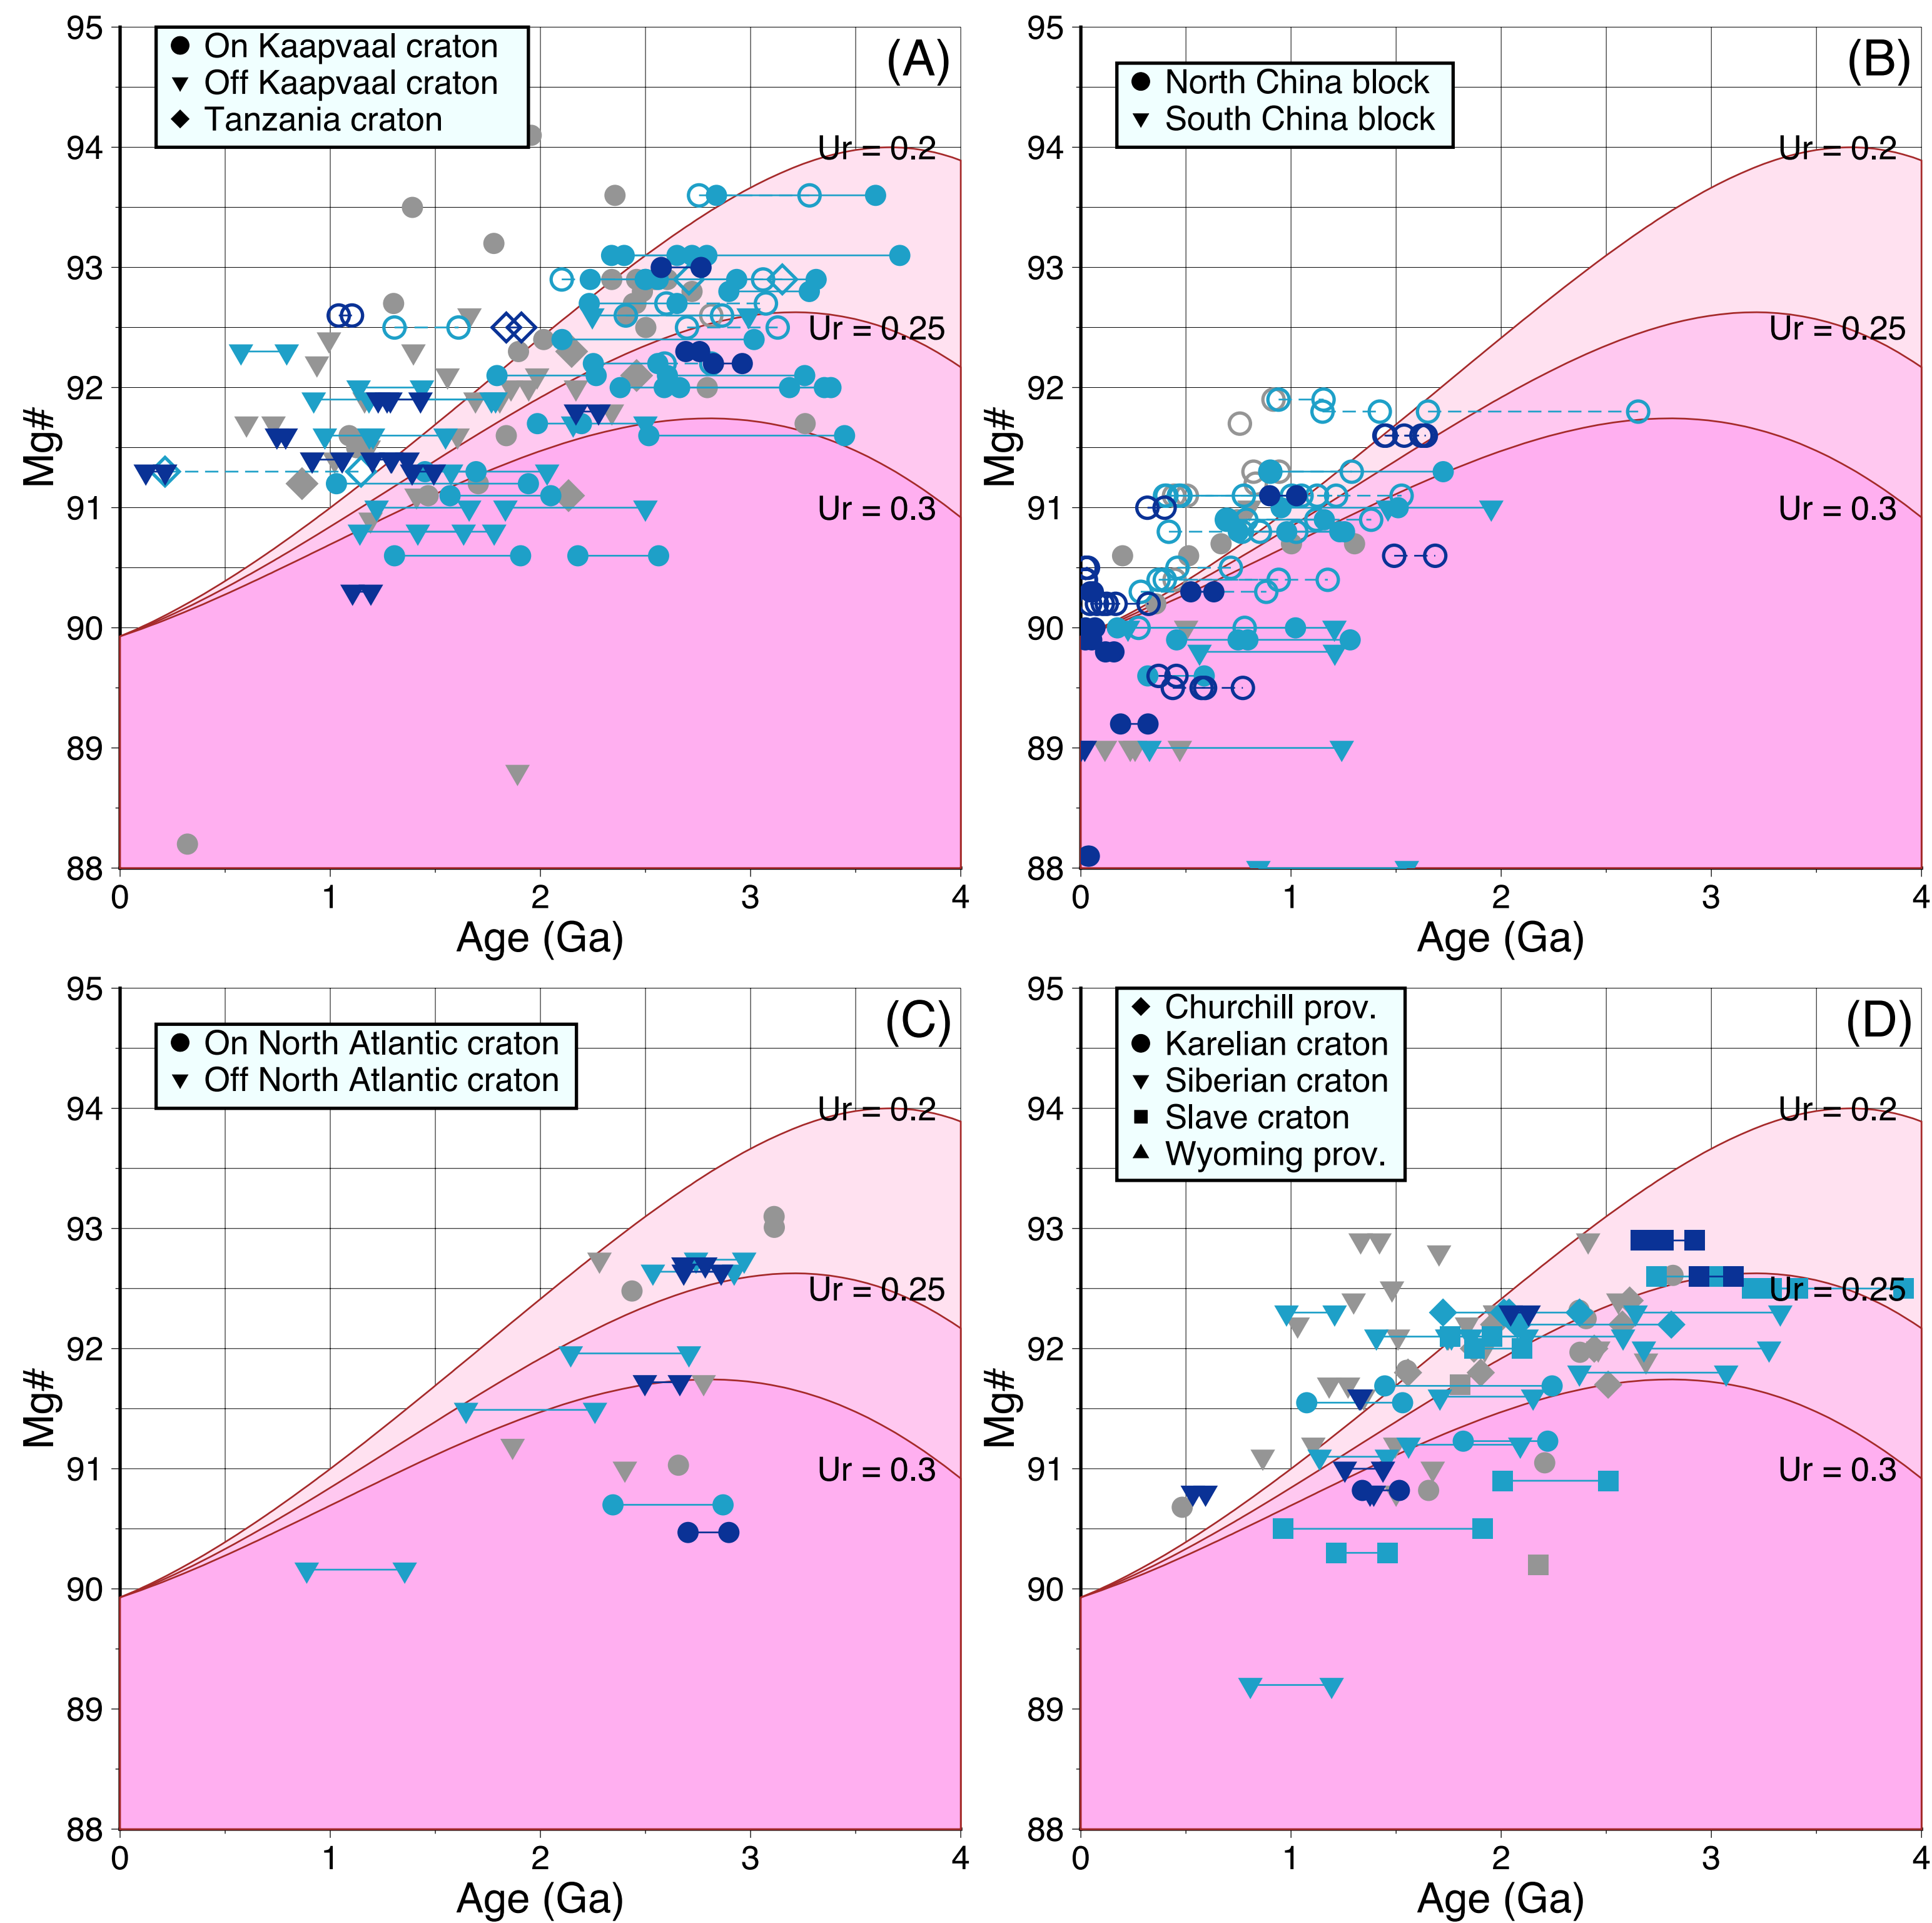

Figure 1

Figure 2

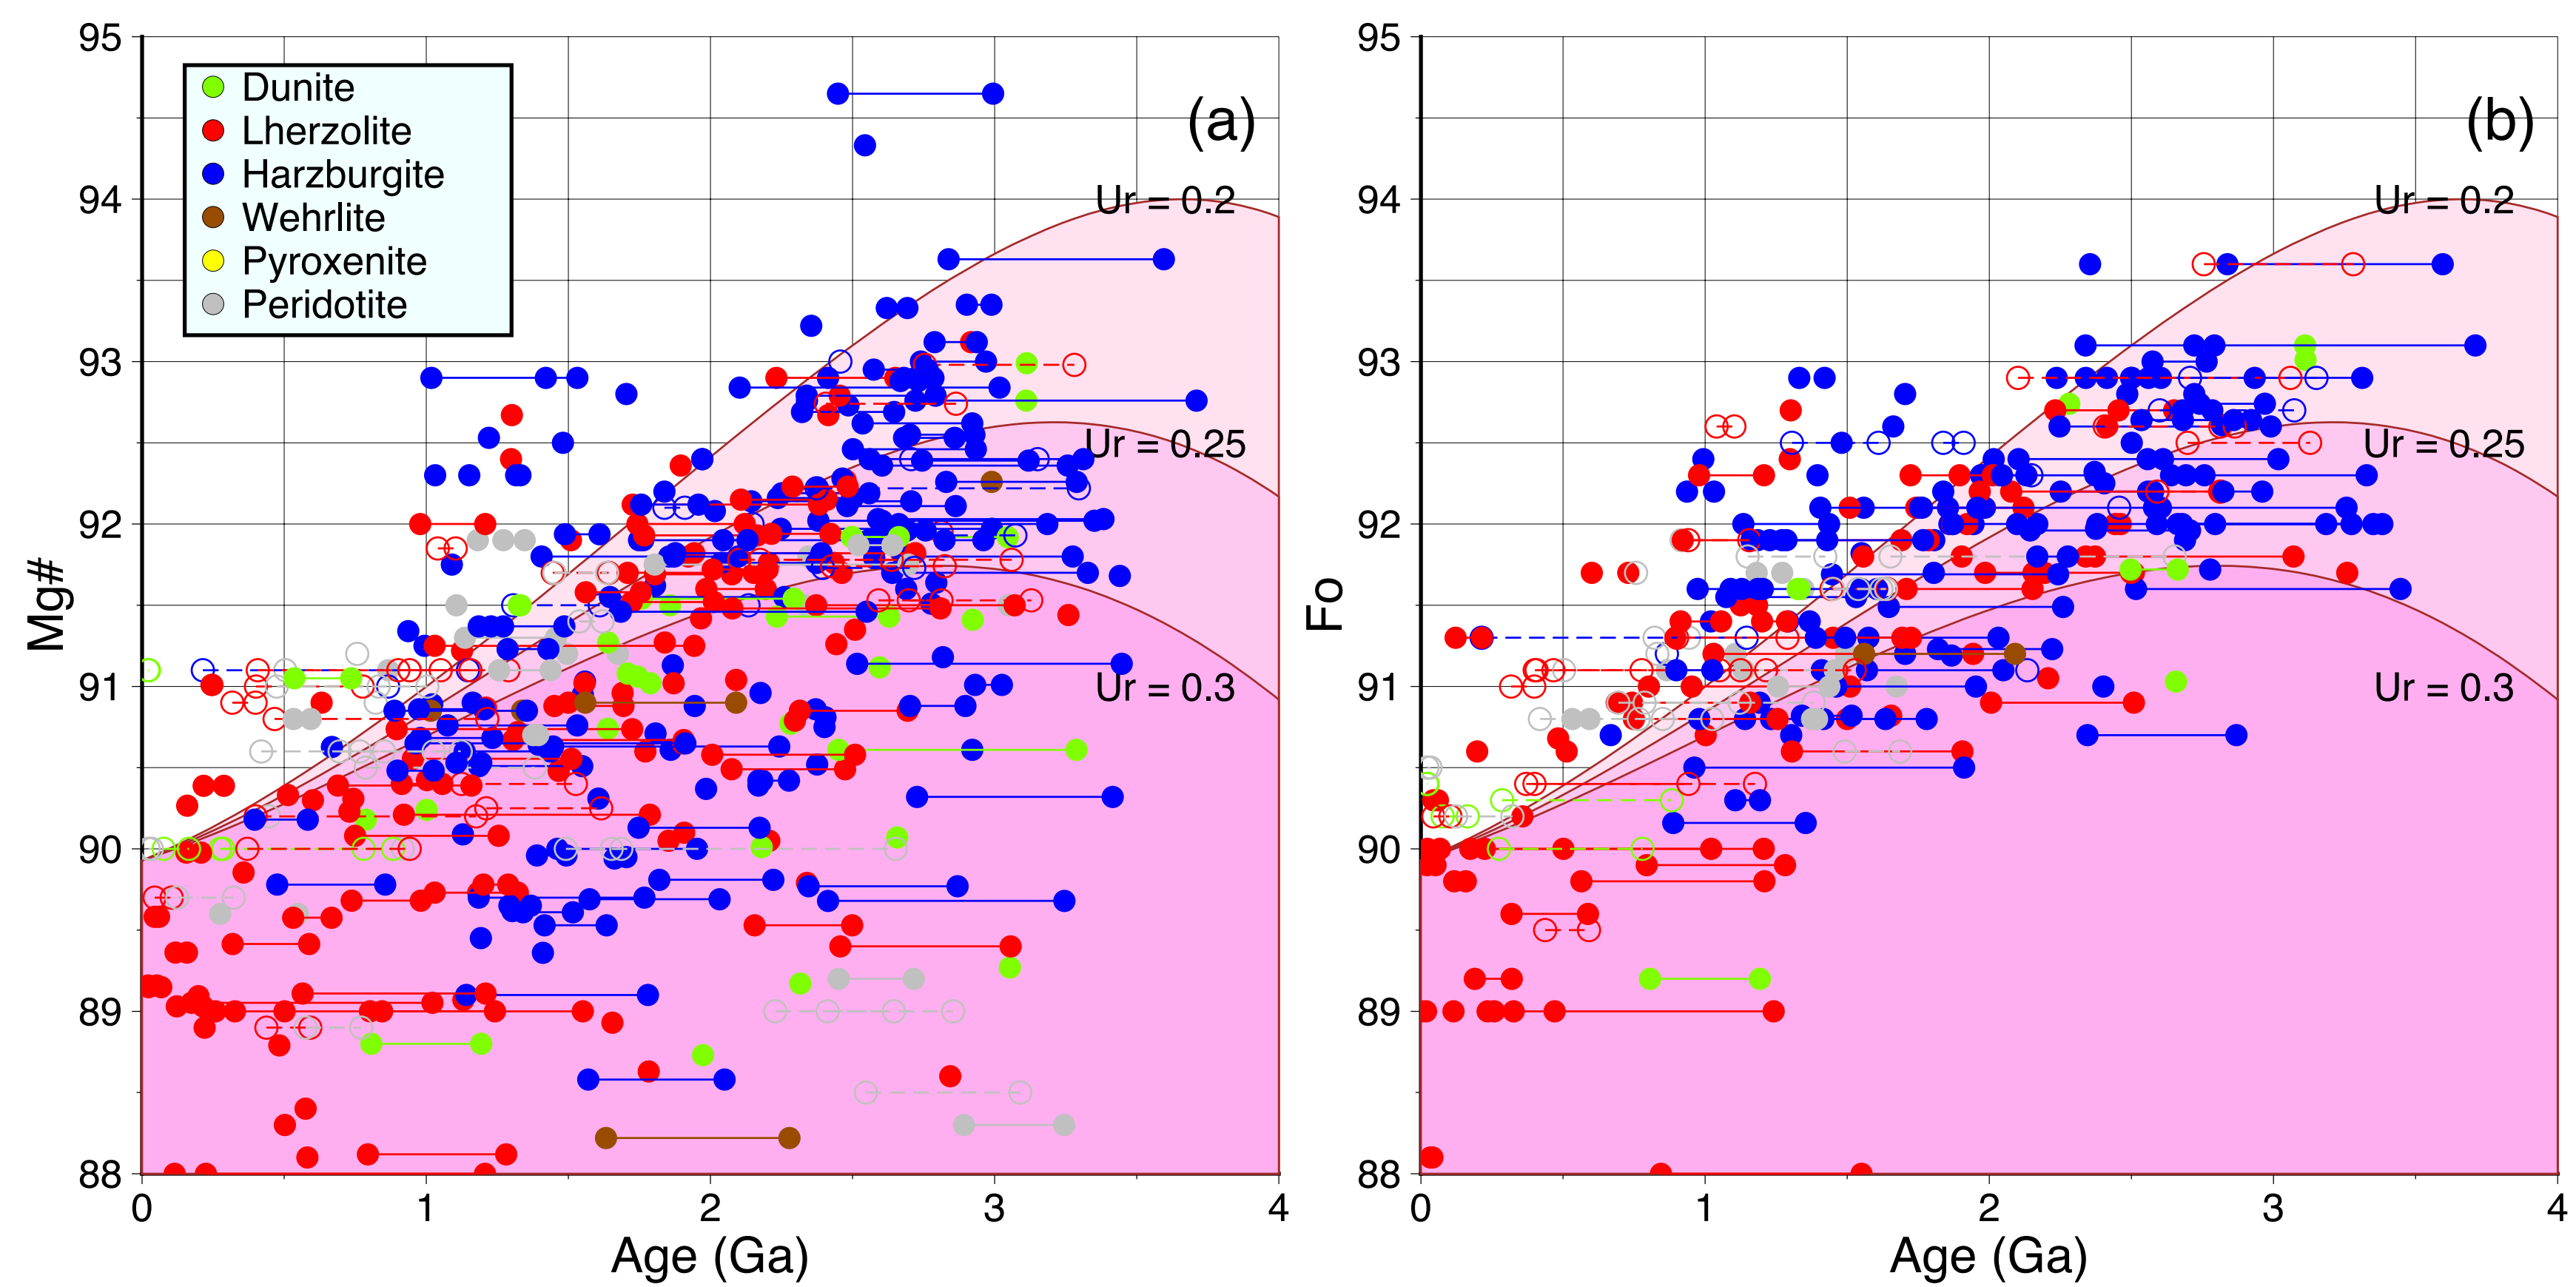

Figure 3

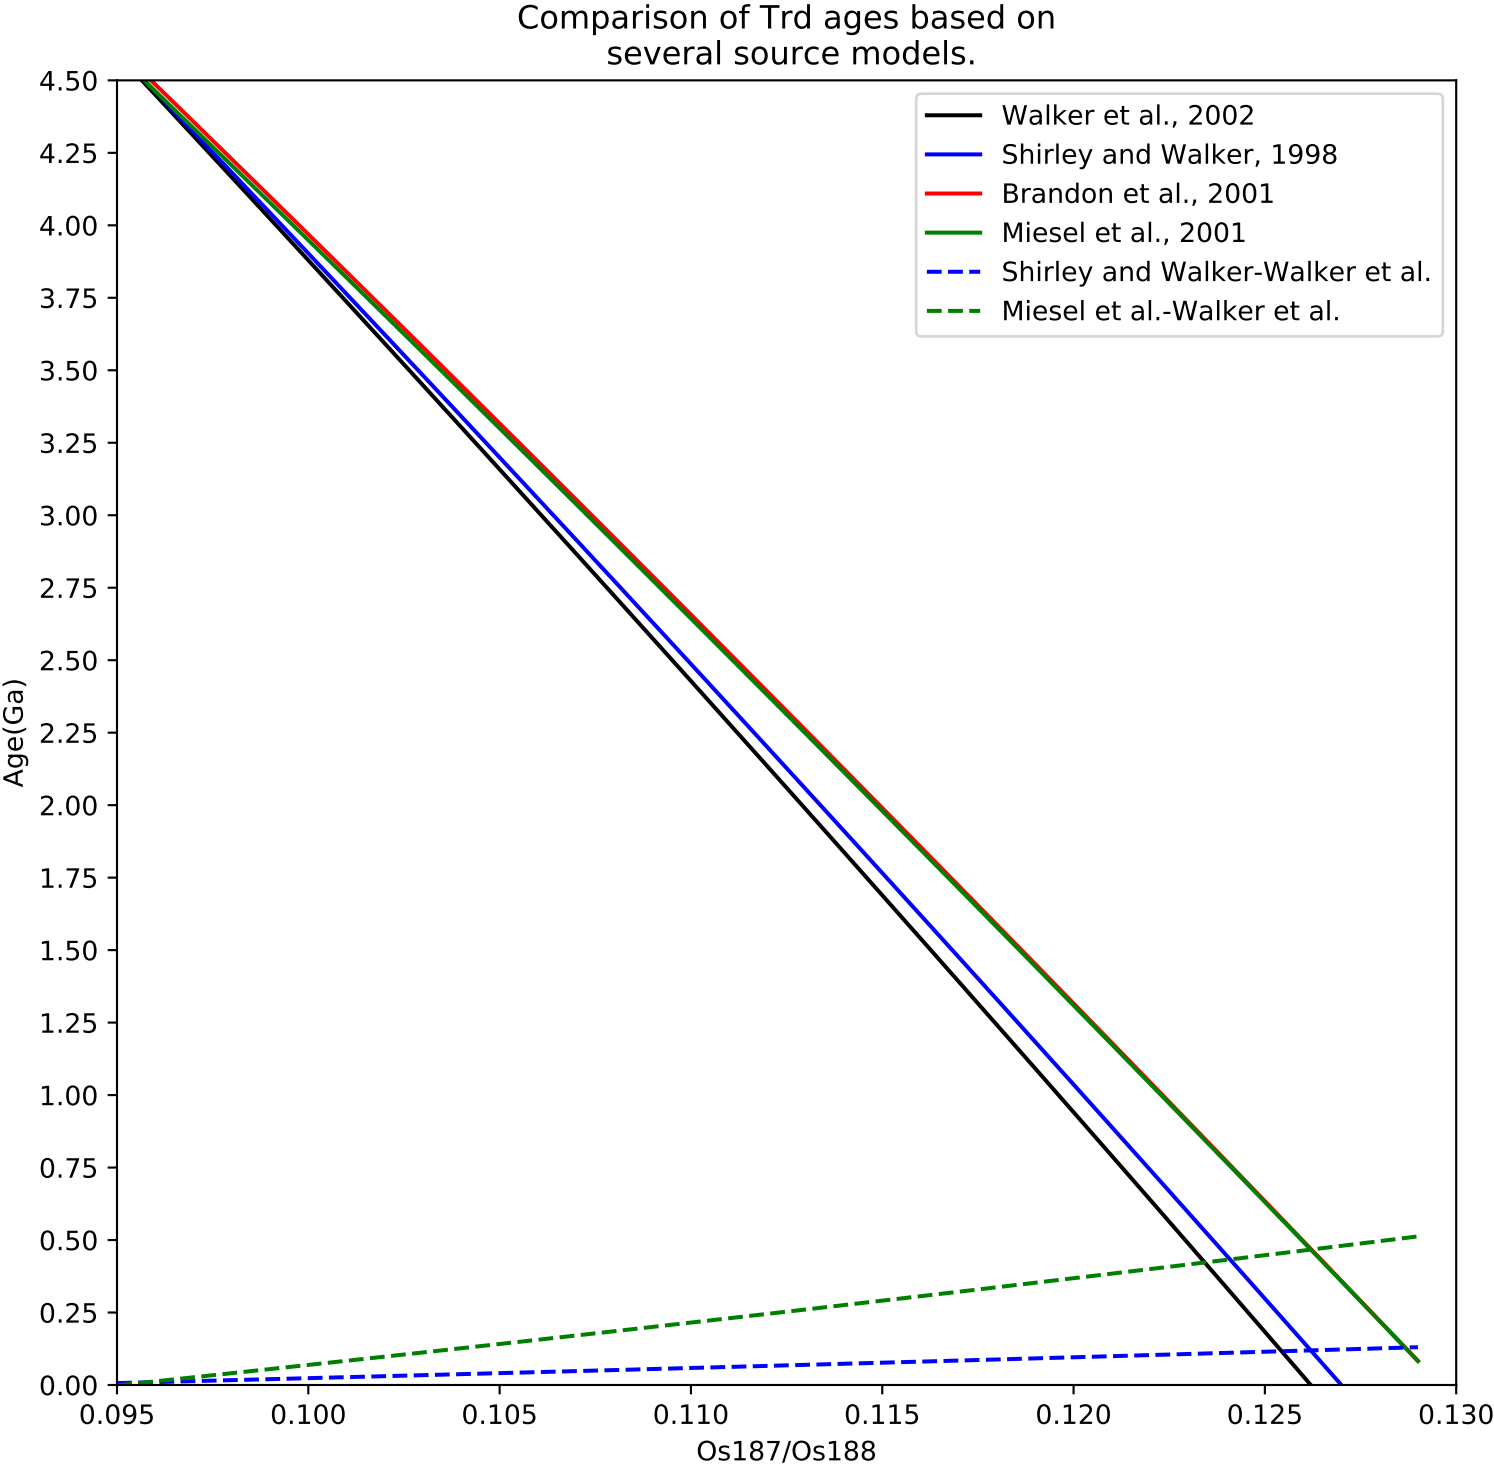

Supplement: Supplementary file 1 [file 1]
